# Supplementary material for: Exploring temporal and spatial variation of nitrous oxide flux using several years of peatland forest automatic chamber data
Source: Copernicus journal article supplement (doi:10.5194/bg-21-1867-2024), 2024-04-17
Supplement: Supplementary file 1 [file bg-21-1867-2024-supplement.pdf]

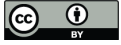

*Supplement of*

## **Exploring temporal and spatial variation of nitrous oxide flux using several years of peatland forest automatic chamber data**

**Helena Rautakoski et al.**

*Correspondence to:* Helena Rautakoski ([helena.rautakoski@fmi.fi](mailto:helena.rautakoski@fmi.fi))

The copyright of individual parts of the supplement might differ from the article licence.

## S1. Chamber characteristics

**Table S1: Vegetation and distance to nearest trees and ditches. Only living trees growing within 5 m from each chamber are included.**

| Chamber | Species                                                                                                                                                                              | Trees (< 5m from chamber)                                                                                                                                                                                                    | Distance to ditch |
|---------|--------------------------------------------------------------------------------------------------------------------------------------------------------------------------------------|------------------------------------------------------------------------------------------------------------------------------------------------------------------------------------------------------------------------------|-------------------|
| 1       | <i>Vaccinium vitis-idea</i> , <i>Carex globularis</i> ,<br><i>Pleurozium schreberi</i> , <i>Hylocomium splendens</i> , <i>Dicranum polysetum</i>                                     | 2.6 m Picea abies, 3.1 m Betula pubescens, 4.8 m Picea Abies                                                                                                                                                                 | 12 m              |
| 2       | <i>Vaccinium myrtillus</i> , <i>Dryopteris carthusiana</i> , <i>Dicranum polysetum</i> ,<br><i>Pleurozium schreberi</i>                                                              | Picea abies 3.7 m                                                                                                                                                                                                            | 10 m              |
| 3       | <i>Sphagnum spp.</i> , <i>Trientalis europaea</i>                                                                                                                                    | 3.2 m Picea abies, 4.2 m Betula pubescens, 2.4 m Picea abies, 2.2 m Betula pubescens, 3 m Picea abies, 4.2 m Betula pubescens, 4.4 m Picea abies                                                                             | 20 m              |
| 4       | <i>Pleurozium schreberi</i> , <i>Dicranum polysetum</i>                                                                                                                              | 2.9 m Picea abies, 2.5 m Betula pubescens, 3.3 m Picea abies, 3.5 m Betula pubescens, 2.4 m Betula pubescens, 2.4 m Picea abies, 2.8 m Picea abies                                                                           | 5 m               |
| 5       | <i>Dryopteris carthusiana</i> , <i>Vaccinium vitis-idaea</i> , <i>Vaccinium myrtillus</i> ,<br><i>Pleurozium schreberi</i> , <i>Dicranum polysetum</i> , <i>Hylocomium splendens</i> | 1.9 m Picea abies, 1.6 m Picea abies, 1.2 m Pinus sylvestris, 4.8 m Betula pubescens, 4.5 m Picea abies                                                                                                                      | 5 m               |
| 6       | <i>Trientalis europaea</i> , <i>Pleurozium schreberi</i> , <i>Dicranum polysetum</i> ,<br><i>Hylocomium splendens</i>                                                                | 2.8 m Picea abies, 3.4 m Betula pubescens, 4.9 m Picea abies, 1.9 m Picea abies, 3.4 m Betula pubescens, 3.8 m Picea abies, 5 m Picea abies, 3.2 m Picea abies, 2.1 m Picea abies, 2.3 m Betula pubescens, 2.7 m Picea abies | 20 m              |

## S2. N<sub>2</sub>O flux histograms

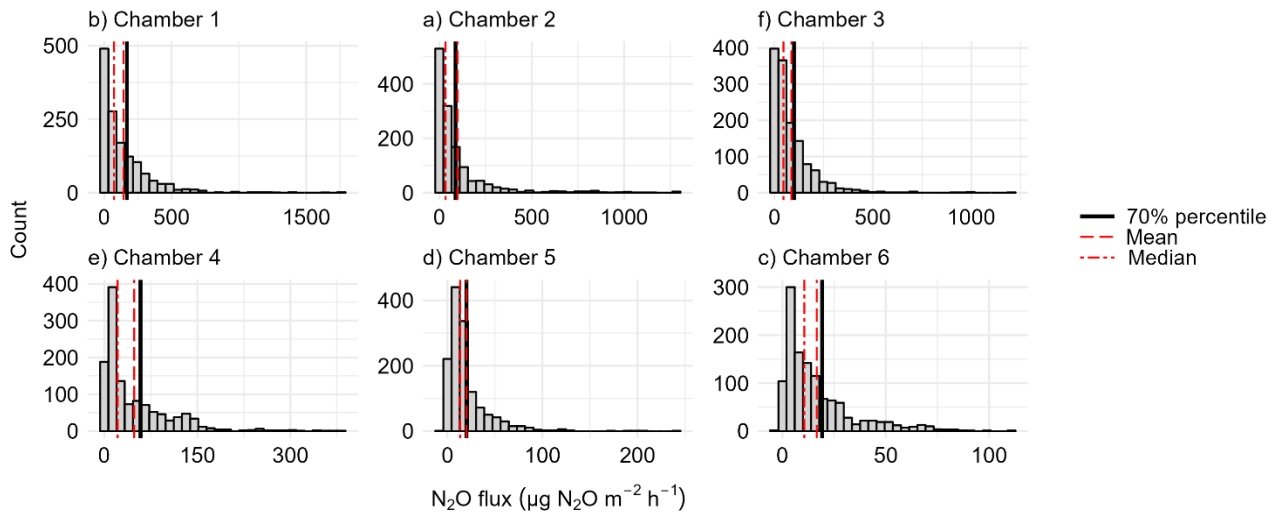

**Figure S1: Distribution of daily mean N<sub>2</sub>O flux in Chambers 1–6. The chamber-specific mean, median and 70 % percentile that was used to define high-flux days, are shown as vertical lines.**

## S3. Spatio-temporal variation of N<sub>2</sub>O fluxes

**Table S2: Mean, minimum and maximum N<sub>2</sub>O fluxes in different measurement years. Unit of the N<sub>2</sub>O flux is  $\mu\text{g N}_2\text{O m}^{-2} \text{h}^{-1}$ . Years 2015 and 2019 include only part of the year (\*). Measurements in Chamber 6 ended six months earlier in 2019 than in other chambers.**

| Chamber | 2015* |     |     | 2016 |     |      | 2017 |     |      | 2018 |     |     | 2019* |     |     |
|---------|-------|-----|-----|------|-----|------|------|-----|------|------|-----|-----|-------|-----|-----|
|         | Mean  | Min | Max | Mean | Min | Max  | Mean | Min | Max  | Mean | Min | Max | Mean  | Min | Max |
| 1       | 77    | 2   | 467 | 215  | 26  | 1266 | 233  | -1  | 1761 | 43   | 0.1 | 322 | 131   | 0.5 | 717 |
| 2       | 63    | 4   | 359 | 189  | 6   | 1272 | 145  | -1  | 1282 | 24   | 0.4 | 198 | 48    | 0   | 294 |
| 3       | 61    | -12 | 476 | 151  | 15  | 1192 | 130  | 7   | 937  | 30   | 0.5 | 227 | 50    | 0   | 333 |
| 4       | 27    | 2   | 85  | 71   | 9   | 228  | 89   | 7   | 381  | 21   | 1   | 110 | 18    | -1  | 87  |
| 5       | 16    | 0   | 54  | 24   | 3   | 118  | 27   | -1  | 244  | 12   | -5  | 201 | 21    | -2  | 103 |
| 6       | 16    | 1   | 71  | 24   | -1  | 111  | 23   | -1  | 74   | 7    | -3  | 31  | 7     | -3  | 25  |

**Table S3: Mean, minimum and maximum N<sub>2</sub>O fluxes ( $\mu\text{g N}_2\text{O m}^{-2} \text{h}^{-1}$ ) in different thermal seasons. All years are included.**

| Chamber | Spring |     |     | Summer |     |      | Autumn |     |     | Winter |     |      |
|---------|--------|-----|-----|--------|-----|------|--------|-----|-----|--------|-----|------|
|         | Mean   | Min | Max | Mean   | Min | Max  | Mean   | Min | Max | Mean   | Min | Max  |
| 1       | 122    | 0   | 621 | 199    | 0   | 1761 | 86     | 2   | 717 | 117    | -1  | 1266 |
| 2       | 55     | -1  | 298 | 173    | 0   | 1282 | 45     | 6   | 211 | 49     | 0   | 339  |
| 3       | 57     | 1   | 228 | 96     | 3   | 937  | 44     | -12 | 220 | 117    | 0   | 1192 |
| 4       | 71     | 1   | 306 | 47     | -1  | 381  | 14     | 1   | 72  | 62     | 1   | 184  |
| 5       | 15     | 0   | 52  | 20     | -5  | 244  | 11     | -1  | 54  | 30     | -3  | 201  |
| 6       | 9      | -3  | 41  | 20     | -1  | 77   | 8      | -3  | 42  | 21     | -1  | 112  |

#### S4. Time series correlations

**Table S4: Correlation of N<sub>2</sub>O time series between each pair of chambers. Correlations were statistically significant ( $p < 0.05$ ).**

|           | Chamber 1 | Chamber 2 | Chamber 3 | Chamber 4 | Chamber 5 | Chamber 6 |
|-----------|-----------|-----------|-----------|-----------|-----------|-----------|
| Chamber 1 | 1.00      | 0.79      | 0.64      | 0.65      | 0.36      | 0.40      |
| Chamber 2 | 0.79      | 1.00      | 0.75      | 0.55      | 0.29      | 0.47      |
| Chamber 3 | 0.64      | 0.75      | 1.00      | 0.69      | 0.41      | 0.53      |
| Chamber 4 | 0.65      | 0.55      | 0.69      | 1.00      | 0.46      | 0.48      |
| Chamber 5 | 0.36      | 0.29      | 0.41      | 0.46      | 1.00      | 0.49      |
| Chamber 6 | 0.40      | 0.47      | 0.53      | 0.48      | 0.49      | 1.00      |

### S5. Temporal variation of N<sub>2</sub>O within a year

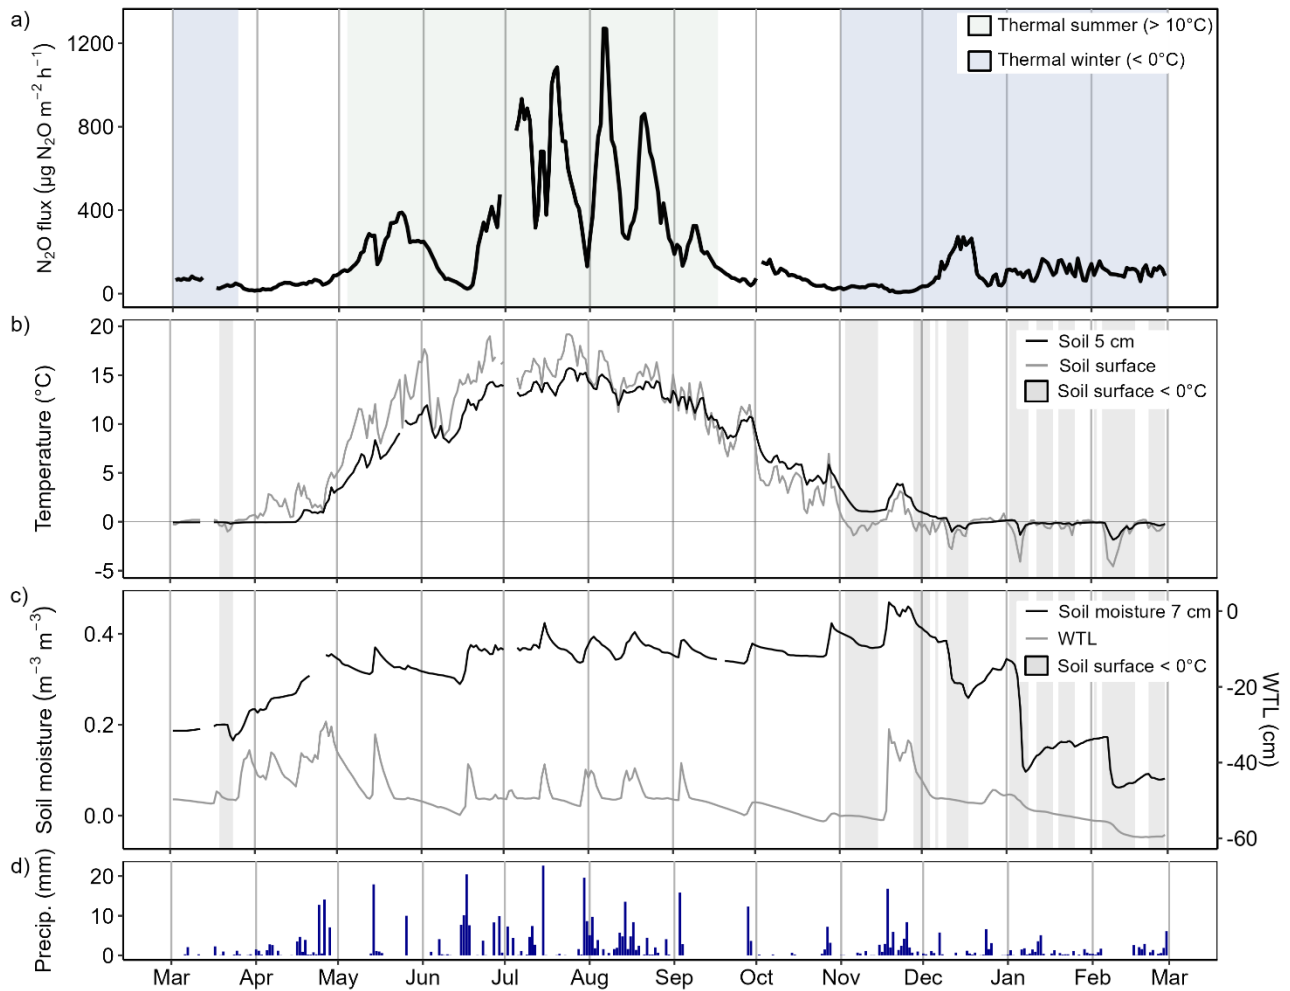

**Figure S2:** a) Daily mean N<sub>2</sub>O flux, b) soil surface temperature and temperature at 5 cm depth with highlighted freezing periods (soil surface temperature < 0 °C), c) soil moisture and water table level (WTL), and (d) daily precipitation from March 2016 to March 2017 in Chamber 2. The shown temporal dynamics of N<sub>2</sub>O flux were measured in a year with relatively wet summer and warm winter. Data are not gap-filled. Figure for Chamber 1 is presented in the manuscript (Fig. 6).

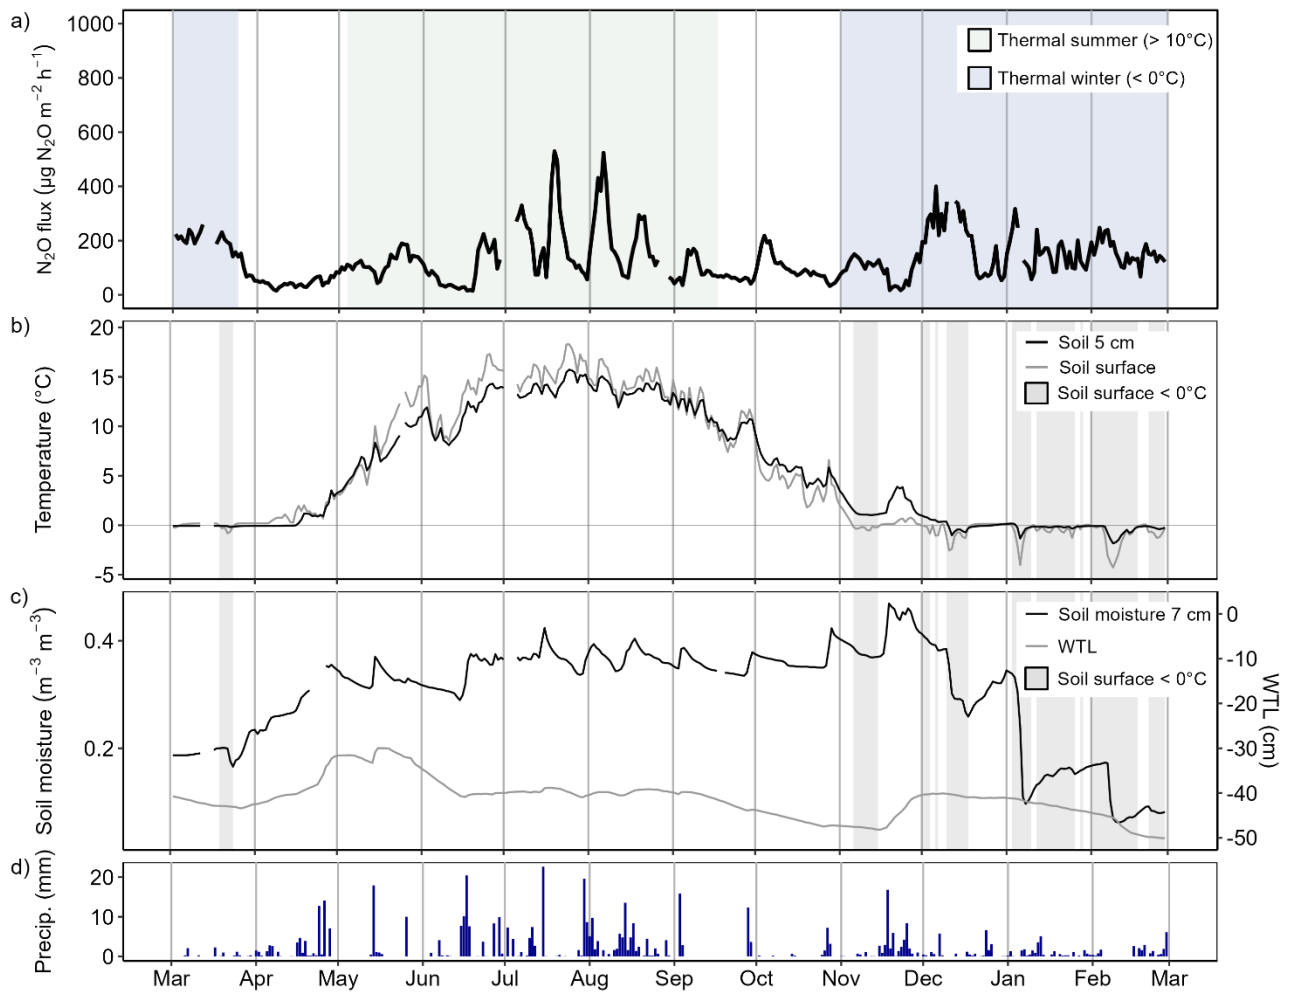

**Figure S3:** a) Daily mean  $\text{N}_2\text{O}$  flux, b) soil surface temperature and temperature at 5 cm depth with highlighted freezing periods (soil surface temperature  $< 0^\circ\text{C}$ ), c) soil moisture and water table level (WTL), and (d) daily precipitation from March 2016 to March 2017 in Chamber 3. The shown temporal dynamics of  $\text{N}_2\text{O}$  flux were measured in a year with relatively wet summer and warm winter. Data are not gap-filled. Figure for Chamber 1 is presented in the manuscript (Fig. 6).

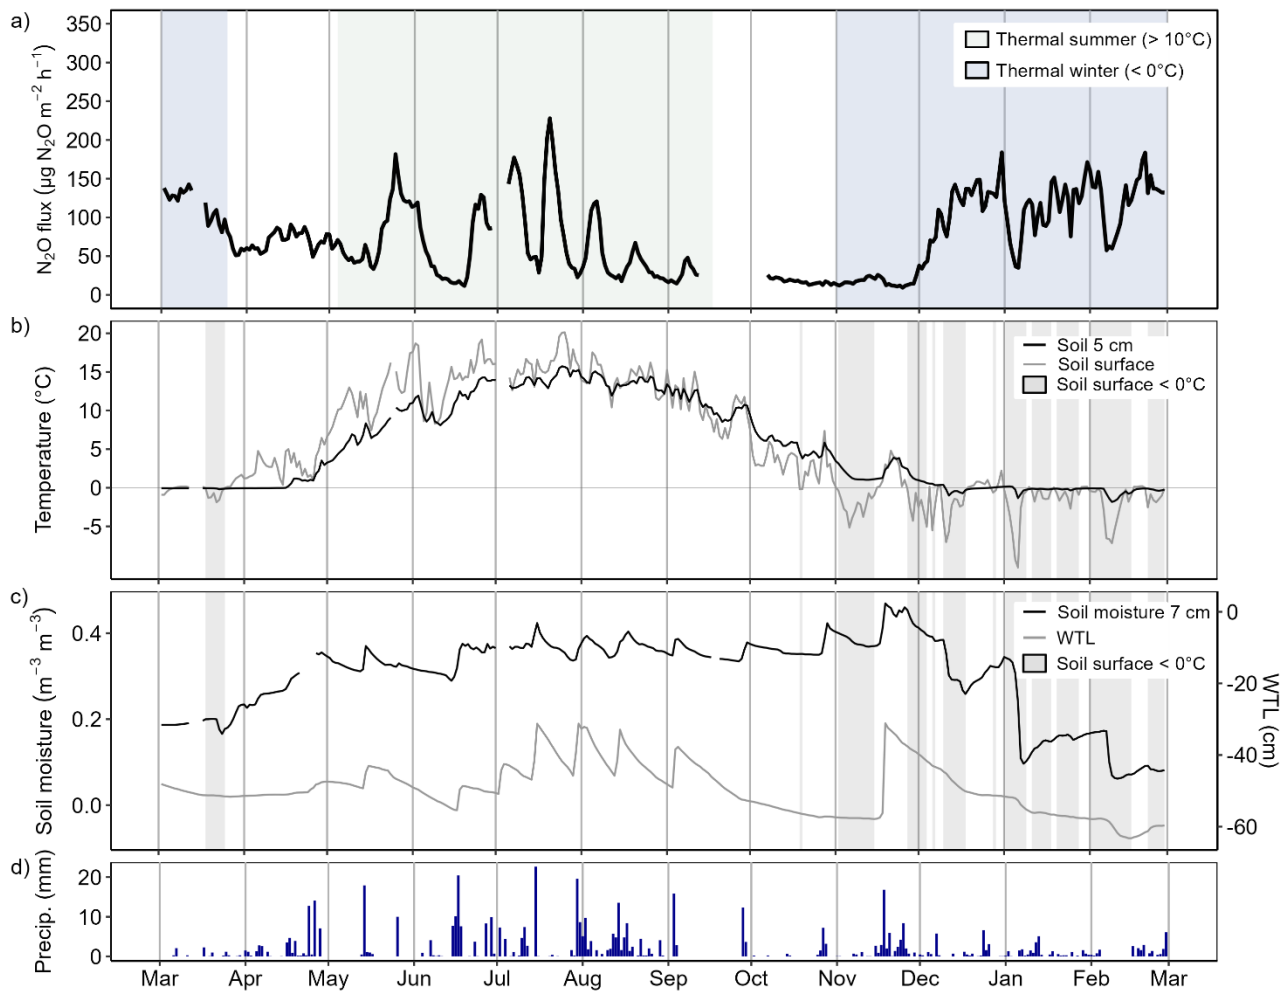

**Figure S4:** a) Daily mean  $\text{N}_2\text{O}$  flux, b) soil surface temperature and temperature at 5 cm depth with highlighted freezing periods (soil surface temperature  $< 0^\circ\text{C}$ ), c) soil moisture and water table level (WTL), and (d) daily precipitation from March 2016 to March 2017 in Chamber 4. The shown temporal dynamics of  $\text{N}_2\text{O}$  flux were measured in a year with relatively wet summer and warm winter. Data are not gap-filled. Figure for Chamber 1 is presented in the manuscript (Fig. 6).

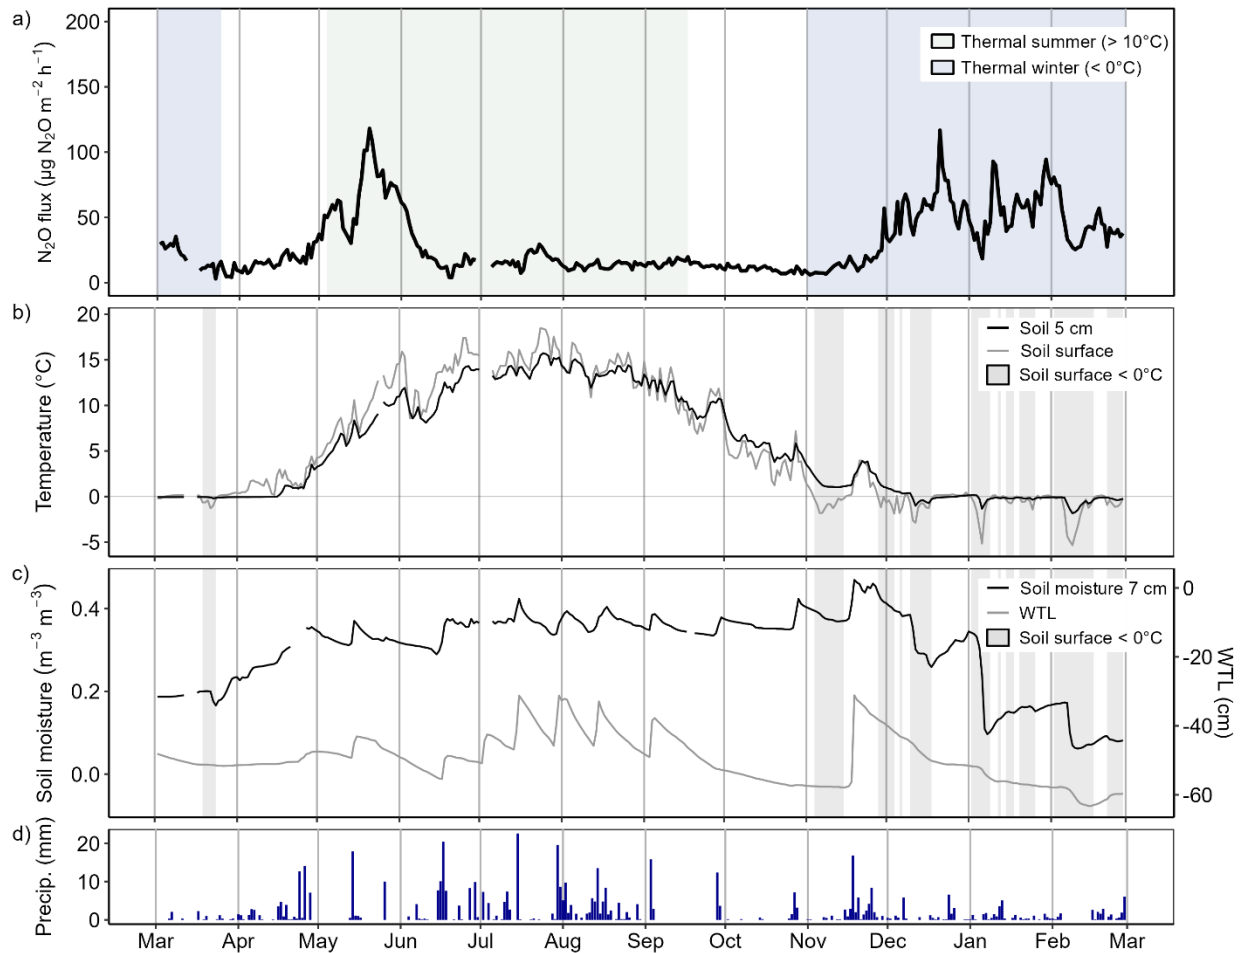

**Figure S5:** a) Daily mean  $\text{N}_2\text{O}$  flux, b) soil surface temperature and temperature at 5 cm depth with highlighted freezing periods (soil surface temperature  $< 0^\circ\text{C}$ ), c) soil moisture and water table level (WTL), and (d) daily precipitation from March 2016 to March 2017 in Chamber 5. The shown temporal dynamics of  $\text{N}_2\text{O}$  flux were measured in a year with relatively wet summer and warm winter. Data are not gap-filled. Figure for Chamber 1 is presented in the manuscript (Fig. 6).



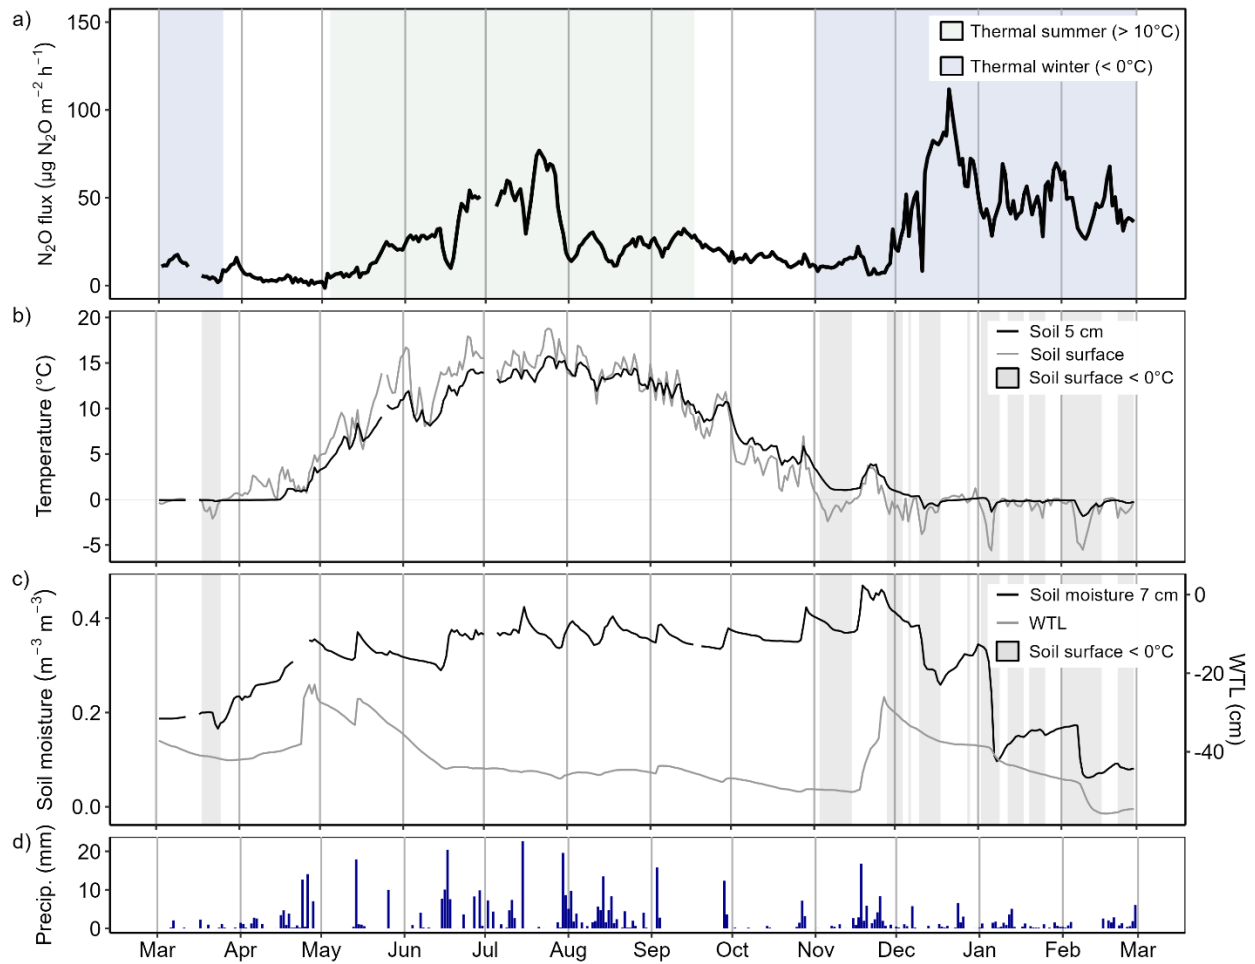

**Figure S6:** a) Daily mean  $N_2O$  flux, b) soil surface temperature and temperature at 5 cm depth with highlighted freezing periods (soil surface temperature  $< 0^\circ C$ ), c) soil moisture and water table level (WTL), and (d) daily precipitation from March 2016 to March 2017 in Chamber 6. The shown temporal dynamics of  $N_2O$  flux were measured in a year with relatively wet summer and warm winter. Data are not gap-filled. Figure for Chamber 1 is presented in the manuscript (Fig. 6).

### S6. Lag-specific variable importance

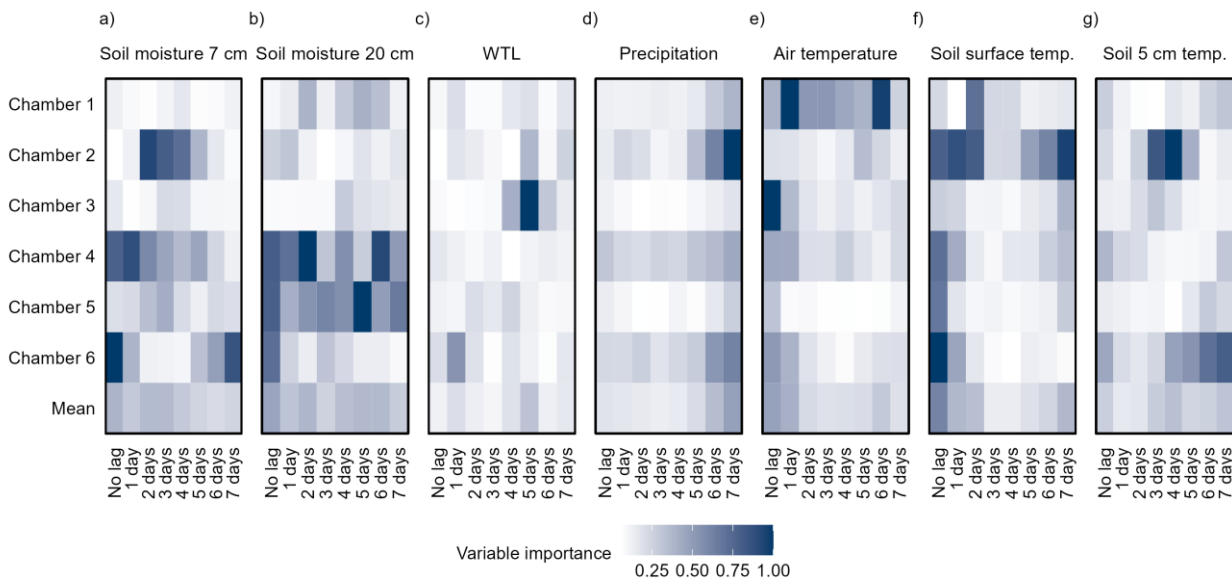

**Figure S7: Variable importance (VI) scores of different environmental variables and their lagged versions in explaining the temporal variation of N<sub>2</sub>O.** The matrix plot shows VI values separately for different chambers (Chambers 1–6) as well as the mean VI across all the chambers (Mean row). VI values are means across 10 runs of Random forest with conditional inference trees. VI scores are scaled between 0 and 1 (0 = lowest importance, 1 = highest importance) per chamber to make VI scores comparable across chambers. Total VIs of each environmental variable are presented in the manuscript (Fig. 8). Comparing VIs of individual lags and unlagged versions of the variables, should be done with care to avoid very data-specific conclusions.

### S7. N<sub>2</sub>O flux responses to immediate and time-lagged environmental conditions

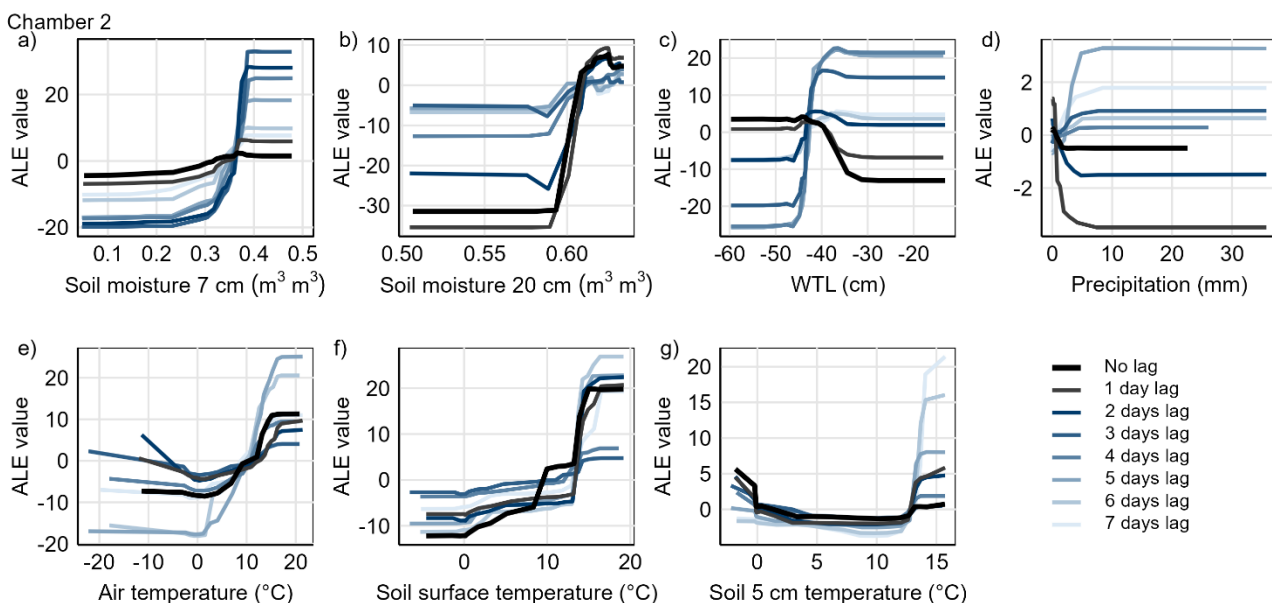

**Figure S8: Response of predicted N<sub>2</sub>O flux to different environmental conditions for Chamber 2 visualized using Accumulated Local Effects (ALE). Figures illustrate how the predicted N<sub>2</sub>O flux values deviate from the mean predicted flux (ALE value = 0) along the gradients of a) soil moisture at 7 cm depth, b) soil moisture at 20 cm depth, c) water table level (WTL), d) precipitation, e) air temperature, f) soil surface temperature and g) soil temperature at 5 cm. ALE responses for unlagged and lagged variables (1–7 days) are included. Responses for chamber 1 are presented in the manuscript (Fig. 9).**

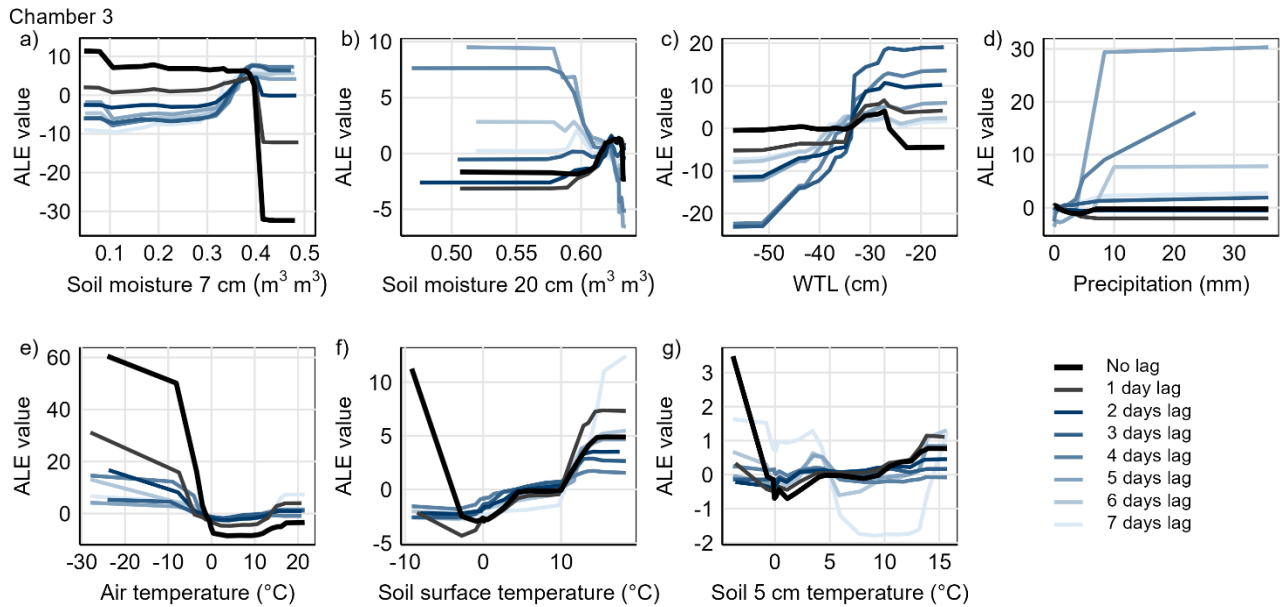

**Figure S9: Response of predicted N<sub>2</sub>O flux to different environmental conditions for Chamber 3 visualized using Accumulated Local Effects (ALE). Figures illustrate how the predicted N<sub>2</sub>O flux values deviate from the mean predicted flux (ALE value= 0) along the gradients of a) soil moisture at 7 cm depth, b) soil moisture at 20 cm depth, c) water table level (WTL), d) precipitation, e) air temperature, f) soil surface temperature and g) soil temperature at 5 cm. ALE responses for unlagged and lagged variables (1–7 days) are included. Responses for chamber 1 are presented in the manuscript (Fig. 9).**

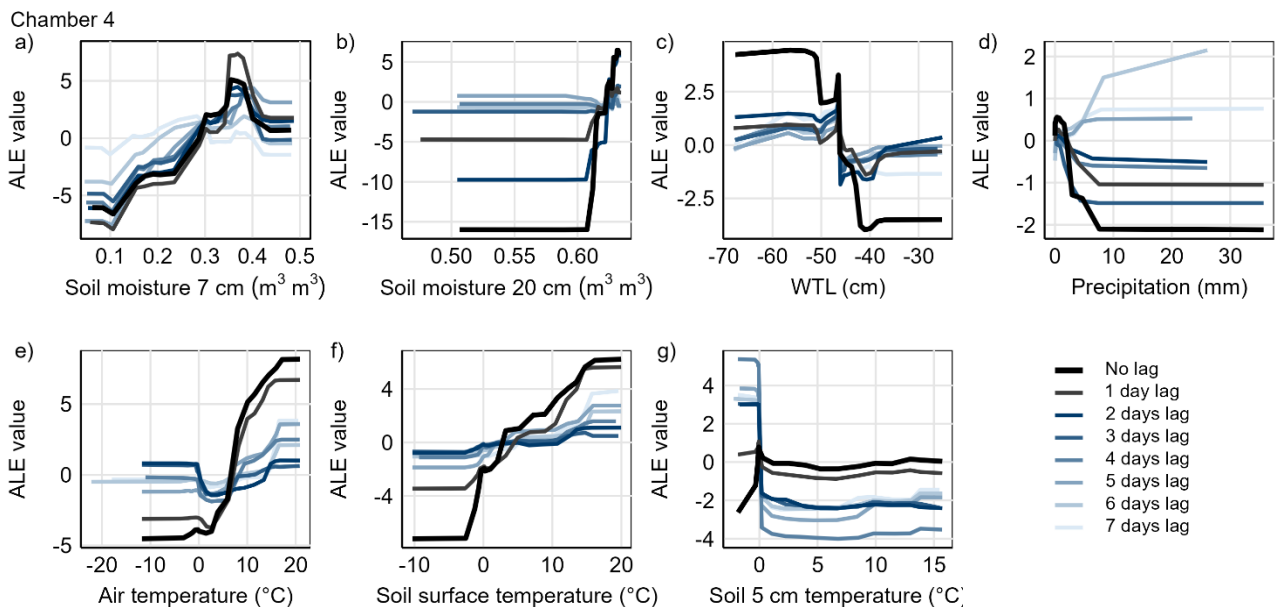

**Figure S10: Response of predicted N<sub>2</sub>O flux to different environmental conditions for Chamber 4 visualized using Accumulated Local Effects (ALE). Figures illustrate how the predicted N<sub>2</sub>O flux values deviate from the mean predicted flux (ALE value = 0) along the gradients of a) soil moisture at 7 cm depth, b) soil moisture at 20 cm depth, c) water table level (WTL), d) precipitation, e) air temperature, f) soil surface temperature and g) soil temperature at 5 cm. ALE responses for unlagged and lagged variables (1–7 days) are included. Responses for chamber 1 are presented in the manuscript (Fig. 9).**

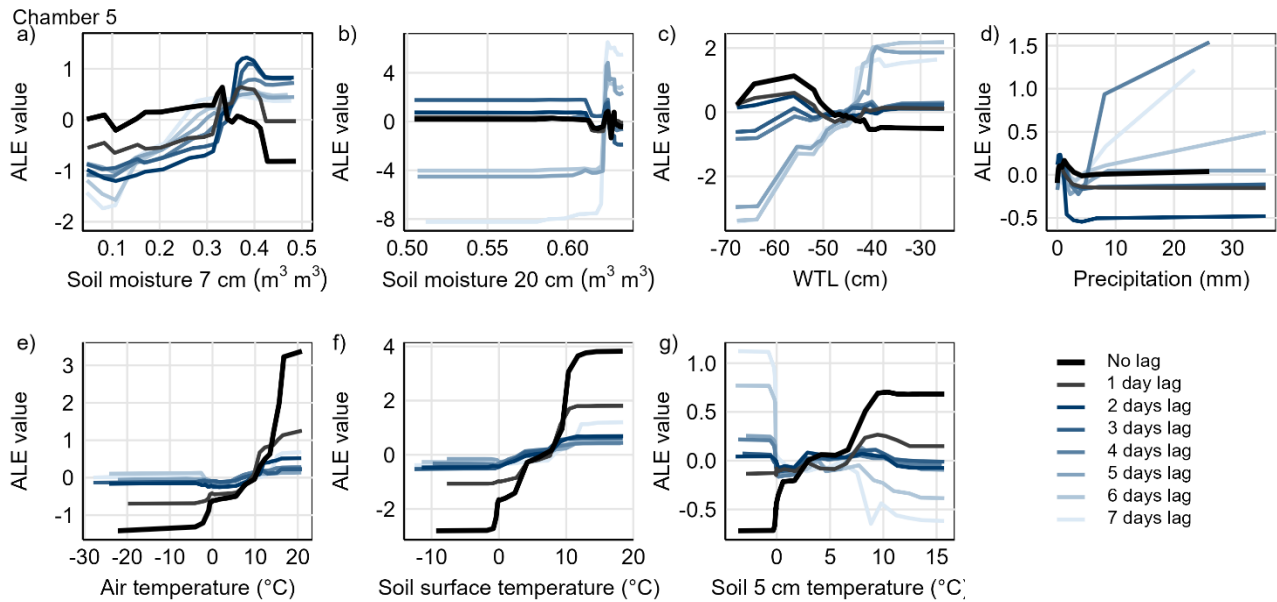

**Figure S11: Response of predicted N<sub>2</sub>O flux to different environmental conditions for Chamber 5 visualized using Accumulated Local Effects (ALE). Figures illustrate how the predicted N<sub>2</sub>O flux values deviate from the mean predicted flux (ALE value = 0) along the gradients of a) soil moisture at 7 cm depth, b) soil moisture at 20 cm depth, c) water table level (WTL), d) precipitation, e) air temperature, f) soil surface temperature and g) soil temperature at 5 cm. ALE responses for unlagged and lagged variables (1–7 days) are included. Responses for chamber 1 are presented in the manuscript (Fig. 9).**

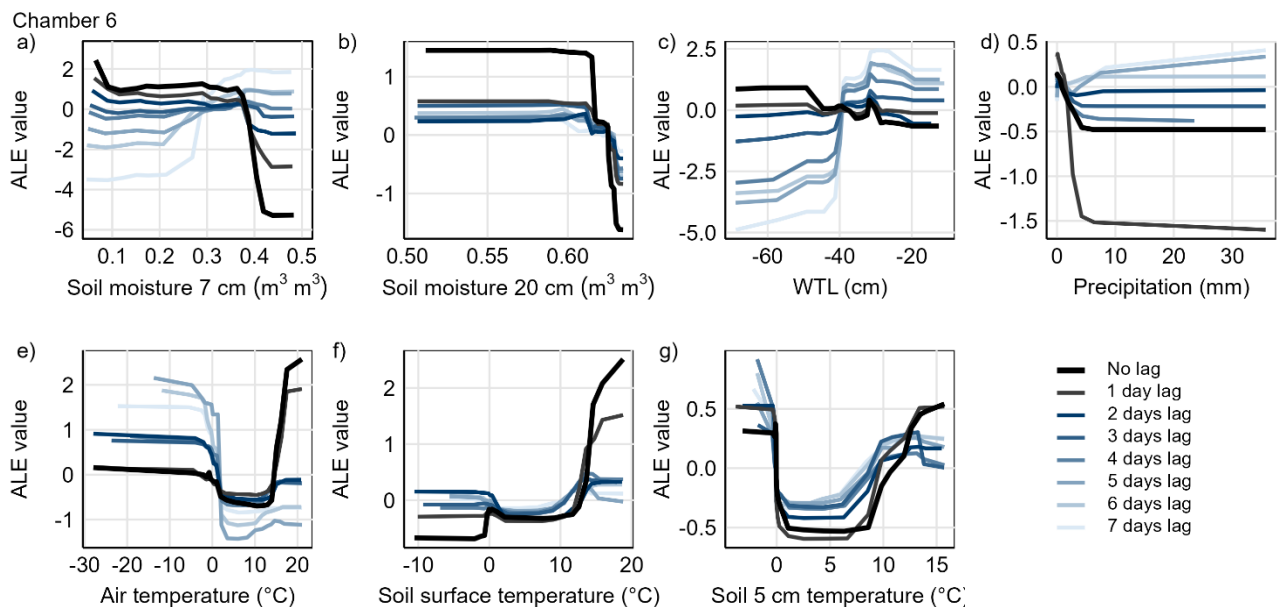

**Figure S12: Response of predicted N<sub>2</sub>O flux to different environmental conditions for Chamber 6 visualized using Accumulated Local Effects (ALE). Figures illustrate how the predicted N<sub>2</sub>O flux values deviate from the mean predicted flux (ALE value = 0) along the gradients of a) soil moisture at 7 cm depth, b) soil moisture at 20 cm depth, c) water table level (WTL), d) precipitation, e) air temperature, f) soil surface temperature and g) soil temperature at 5 cm. ALE responses for unlagged and lagged variables (1–7 days) are included. Responses for chamber 1 are presented in the manuscript (Fig. 9).**

## S8. N<sub>2</sub>O budgets and seasonal contributions

**Table S5: Annual N<sub>2</sub>O budgets in different chambers. Unit of N<sub>2</sub>O budget is mg N<sub>2</sub>O m<sup>-2</sup> y<sup>-1</sup>. The annual N<sub>2</sub>O budget includes only part of the year in 2015 (summer and autumn) and 2019 (spring and summer) (\*). Measurements in Chamber 6 ended in early 2019 and the annual budget was not calculated for that year.**

| Chamber | 2015* | 2016 | 2017 | 2018 | 2019* |
|---------|-------|------|------|------|-------|
| 1       | 469   | 1886 | 2114 | 399  | 790   |
| 2       | 360   | 1613 | 1367 | 222  | 283   |
| 3       | 350   | 1340 | 1116 | 281  | 284   |
| 4       | 141   | 613  | 743  | 214  | 112   |
| 5       | 88    | 210  | 246  | 112  | 155   |
| 6       | 87    | 214  | 200  | 59   | -     |
| Mean    | 249   | 979  | 964  | 215  | 325   |

**Table S6: Contributions of spring fluxes to annual N<sub>2</sub>O budgets. Contributions are expressed as percentage (%) of the annual budget. The annual N<sub>2</sub>O budget includes only part of the year in 2015 and 2019 (\*). Measurements in Chamber 6 ended in early 2019 and the annual N<sub>2</sub>O budget was not calculated for that year.**

| Chamber | 2015* | 2016 | 2017 | 2018 | 2019* |
|---------|-------|------|------|------|-------|
| 1       | -     | 5    | 12   | 9    | 24    |
| 2       | -     | 3    | 11   | 6    | 19    |
| 3       | -     | 4    | 14   | 9    | 26    |
| 4       | -     | 11   | 27   | 13   | 45    |
| 5       | -     | 8    | 6    | 8    | 21    |
| 6       | -     | 2    | 12   | 9    | -     |
| Mean    | -     | 6    | 14   | 9    | 27    |

**Table S7: Contributions of summer fluxes to annual N<sub>2</sub>O budgets. Contributions are expressed as percentage (%) of the annual budget. The annual N<sub>2</sub>O budget includes only part of the year in 2015 and 2019 (\*). Measurements in Chamber 6 ended in early 2019 and the annual N<sub>2</sub>O budget was not calculated for that year.**

| Chamber | 2015* | 2016 | 2017 | 2018 | 2019* |
|---------|-------|------|------|------|-------|
| 1       | 77    | 52   | 61   | 64   | 48    |
| 2       | 53    | 79   | 67   | 59   | 64    |
| 3       | 63    | 36   | 48   | 41   | 63    |

|      |    |    |    |    |    |
|------|----|----|----|----|----|
| 4    | 66 | 35 | 39 | 36 | 34 |
| 5    | 52 | 44 | 48 | 28 | 15 |
| 6    | 66 | 45 | 42 | 42 | -  |
| Mean | 63 | 49 | 51 | 45 | 45 |

**Table S8: Contributions of autumn fluxes to annual N<sub>2</sub>O budgets. Contributions are expressed as percentage (%) of the annual budget. The annual N<sub>2</sub>O budget includes only part of the year in 2015 and 2019 (\*).**

| Chamber | 2015* | 2016 | 2017 | 2018 | 2019* |
|---------|-------|------|------|------|-------|
| 1       | 18    | 5    | 14   | 7    | -     |
| 2       | 37    | 5    | 9    | 12   | -     |
| 3       | 24    | 7    | 14   | 13   | -     |
| 4       | 30    | 5    | 6    | 5    | -     |
| 5       | 41    | 6    | 16   | 8    | -     |
| 6       | 25    | 8    | 12   | 6    | -     |
| Mean    | 29    | 6    | 12   | 9    | -     |

**Table S9: Contributions of winter fluxes to annual N<sub>2</sub>O budgets. Contributions are expressed as percentage (%) of the annual budget. The annual N<sub>2</sub>O budget includes only part of the year in 2015 and 2019 (\*).**

| Chamber | 2015* | 2016 | 2017 | 2018 | 2019* |
|---------|-------|------|------|------|-------|
| 1       | -     | 37   | 14   | 20   | -     |
| 2       | -     | 13   | 24   | 23   | -     |
| 3       | -     | 53   | 27   | 36   | -     |
| 4       | -     | 49   | 30   | 45   | -     |
| 5       | -     | 43   | 34   | 56   | -     |
| 6       | -     | 44   | 20   | 43   | -     |
| Mean    | -     | 40   | 25   | 37   | -     |

## S9. Model performance

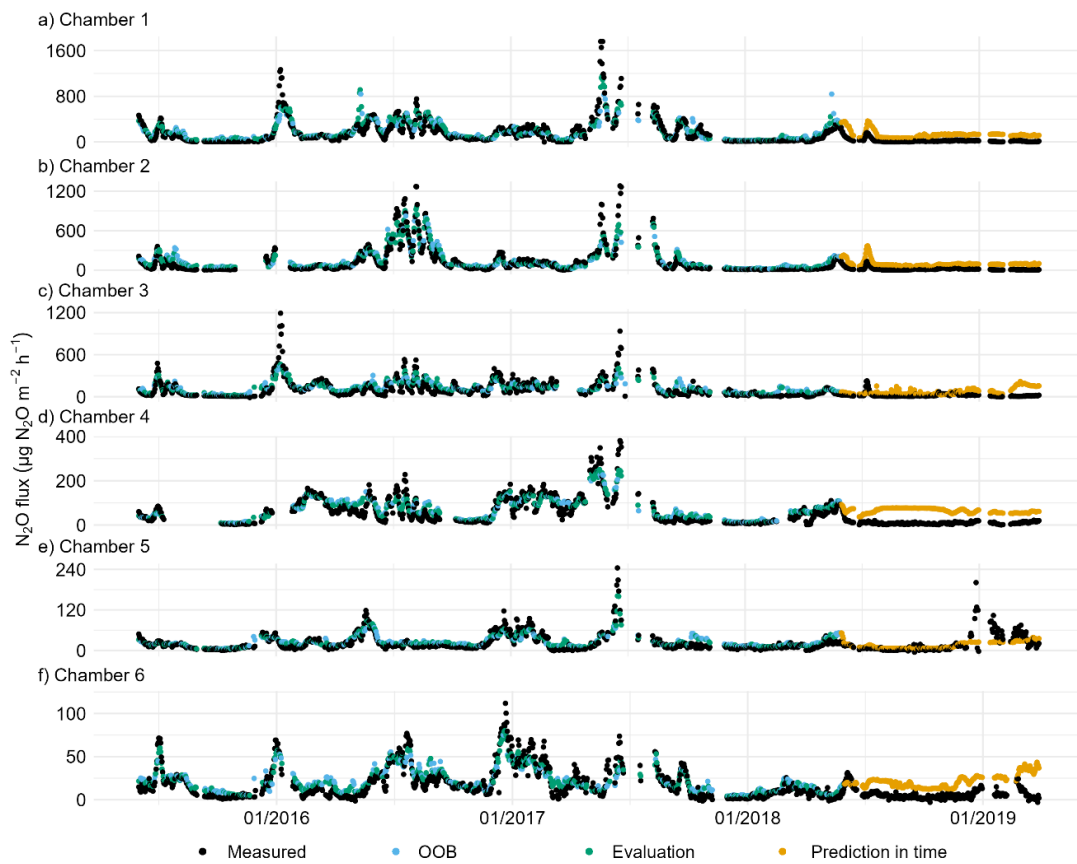

**Figure S13: Measured and predicted N<sub>2</sub>O fluxes plotted against time. Figures (a–f) show predicted values from random forest with conditional inference trees separately for six chambers. Points are colored by the used data with out-of-bag (OOB) data, evaluation data within training period (30 % of first three years of data) and prediction in time data (outside model training period, fourth year of data) different types of evaluation datasets, and daily means of measured fluxes.**
